# Supplementary material
Source: publisher figshare collection journal article supplement (https://acs.figshare.com/ndownloader/files/5802333)
Supplement: Supplementary file 1 [file 5802333]

#### Terms & Conditions

Electronic Supporting Information files are available without a subscription to ACS Web Editions. The American Chemical Society holds a copyright ownership interest in any copyrightable Supporting Information. Files available from the ACS website may be downloaded for personal use only. Users are not otherwise permitted to reproduce, republish, redistribute, or sell any Supporting Information from the ACS website, either in whole or in part, in either machine-readable form or any other form without permission from the American Chemical Society. For permission to reproduce, republish and redistribute this material, requesters must process their own requests via the RightsLink permission system. Information about how to use the RightsLink permission system can be found at <http://pubs.acs.org/page/copyright/permissions.html>

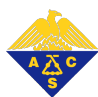

ACS Publications

MOST TRUSTED. MOST CITED. MOST READ.

Copyright © 1998 American Chemical Society

**Supporting Information Available:** Characterization data and experimental procedures of **2a**, **2b**, **2e**, **2f**, *syn*-**2h**, **2i-2k** (3 pages).

**General procedure of iodoaziridination:** To tosylamide **1a** (212 mg, 1 mmol) in toluene (5 mL) was added *t*-BuOK (168 mg, 1.5 mmol) under argon atmosphere at rt. After the mixture was stirred for 30 min, I<sub>2</sub> (762 mg, 3 mmol) was added, and then the reaction mixture was stirred for 15 min at rt. The mixture was poured into aqueous Na<sub>2</sub>S<sub>2</sub>O<sub>3</sub> solution and extracted with AcOEt. The AcOEt extracts were washed with brine, dried over MgSO<sub>4</sub>, and evaporated to dryness. Purification of the residue by column chromatography (hexane / EtOAc = 9) gave **2a** (317 mg, 94 %).

***N*-Tosyl iodomethylaziridine (2a).** **2a:** colorless solid; mp 36 °C; IR (KBr) 1325, 1160 cm<sup>-1</sup>; <sup>1</sup>H-NMR (CDCl<sub>3</sub>) δ 7.84 (2H, d, *J* = 8.4 Hz), 7.36 (2H, d, *J* = 8.4 Hz), 2.99-3.14 (3H, m), 2.83 (1H, d, *J* = 6.6 Hz), 2.45 (3H, s), 2.17 (1H, d, *J* = 3.7 Hz); <sup>13</sup>C-NMR (CDCl<sub>3</sub>) δ 144.8, 134.4, 129.7, 128.2, 41.0, 36.1, 21.6, 2.3; MS (*m/z*) 337 (M<sup>+</sup>), 210; Anal. Calcd for C<sub>10</sub>H<sub>12</sub>INO<sub>2</sub>S: C, 35.62; H, 3.59; N, 4.15. Found; C, 35.66; H, 3.78; N, 4.11.

***N*-Mesyl iodomethylaziridine (2b).** **2b** was prepared from **1b** (68 mg, 0.5 mmol) in accordance with general procedure of iodoaziridination. Purification of the residue by column chromatography (hexane / EtOAc = 9 ) gave **2b** (59 mg, 45 %). **2b:** colorless solid; mp 46.0 °C; IR (KBr) 1312, 1160 cm<sup>-1</sup>; <sup>1</sup>H-NMR (CDCl<sub>3</sub>) δ 3.18 (3H, s), 3.00-3.29 (3H, m), 2.85 (1H, d, *J* = 6.3 Hz), 2.24 (1H, d, *J* = 3.4 Hz); <sup>13</sup>C-NMR (CDCl<sub>3</sub>) δ 41.2, 40.1, 35.6, 2.8; MS (*m/z*) 261 (M<sup>+</sup>), 182; Anal. Calcd for C<sub>4</sub>H<sub>8</sub>INO<sub>2</sub>S: C, 18.40; H, 3.09; N, 5.36. Found; C, 18.46; H, 3.30; N, 5.40.

***N*-Tosyl 1-iodomethy-1-methylaziridine (2e).** **2e** was prepared from **1e** (113 mg, 0.5 mmol) in accordance with general procedure of iodoaziridination. Purification of the residue by column chromatography (hexane / EtOAc = 9 ) gave **2e** (159 mg, 90 %). **2e:** colorless solid; mp 76.5 °C; IR (KBr) 1316, 1158 cm<sup>-1</sup>; <sup>1</sup>H-NMR (CDCl<sub>3</sub>) δ 7.83 (2H, d, *J* = 8.4 Hz), 7.33 (2H, d, *J* = 8.4 Hz), 3.33 (1H, d, *J* = 11.0 Hz), 3.31 (1H, d, *J* = 11.0 Hz), 2.77 (1H, s), 2.44 (3H, s), 2.40 (1H, s), 1.81 (3H, s);

$^{13}\text{C}$ -NMR ( $\text{CDCl}_3$ )  $\delta$  144.2, 137.1, 129.5, 127.5, 49.5, 42.8, 21.6, 18.4, 12.0; MS ( $m/z$ ) 351 ( $\text{M}^+$ ), 224; Anal. Calcd for  $\text{C}_{12}\text{H}_{14}\text{INO}_2\text{S}$ : C, 37.60; H, 4.02; N, 3.99. Found; C, 37.77; H, 4.12; N, 4.01.

***N*-Tosyl 1,2-imino-3-iodo-3-methylbutene (2f).** **2f** was prepared from **1f** (120 mg, 0.5 mmol) in accordance with general procedure of iodoaziridination. Purification of the residue by column chromatography (hexane / EtOAc = 9) gave **2f** (135 mg, 74 %). **2f**: colorless solid; mp 63 °C; IR (KBr) 1326, 1161  $\text{cm}^{-1}$ ;  $^1\text{H}$ -NMR ( $\text{CDCl}_3$ )  $\delta$  7.84 (2H, d,  $J$  = 8.2 Hz), 7.35 (2H, d,  $J$  = 8.2 Hz), 3.22 (1H, dd,  $J$  = 4.6, 7.0 Hz), 2.71 (1H, d,  $J$  = 7.0 Hz), 2.45 (3H, s), 2.33 (1H, d,  $J$  = 4.6 Hz), 1.76 (3H, s), 1.70 (3H, s);  $^{13}\text{C}$ -NMR ( $\text{CDCl}_3$ )  $\delta$  144.8, 134.3, 129.7, 128.3, 51.2, 40.4, 35.2, 32.6, 31.4, 21.7; MS ( $m/z$ ) 366 ( $\text{M}^++1$ ), 238; Anal. Calcd for  $\text{C}_{12}\text{H}_{16}\text{INO}_2\text{S}$ : C, 39.46; H, 4.42; N, 3.84. Found; C, 39.67; H, 4.38; N, 3.89.

**(2*R*\*,3*R*\*)-N-Tosyl 1,2-imino-3-iodo-4-benzyloxybutane (syn-2h).** **syn-2h** was prepared from **Z-1h** (166 mg, 0.5 mmol) in accordance with general procedure of iodoaziridination. Purification of the residue by column chromatography (hexane / EtOAc = 9) gave **syn-2h** (179 mg, 78 %). **syn-2h**: colorless solid; mp 74.5 °C; IR (KBr) 1327, 1162  $\text{cm}^{-1}$ ;  $^1\text{H}$ -NMR ( $\text{CDCl}_3$ )  $\delta$  7.86 (2H, d,  $J$  = 8.3 Hz), 7.27-7.39 (7H, m), 4.52 (2H, s), 3.59-3.80 (3H, m), 3.03 (1H, ddd,  $J$  = 4.1, 6.9, 7.8 Hz), 2.90 (1H, d,  $J$  = 6.9 Hz), 2.44 (3H, s), 2.37 (1H, d,  $J$  = 4.1 Hz);  $^{13}\text{C}$ -NMR ( $\text{CDCl}_3$ )  $\delta$  144.8, 137.3, 134.3, 129.5, 128.5, 128.4, 127.8, 127.5, 73.2, 73.0, 44.1, 36.1, 27.0, 21.6; MS ( $m/z$ ) 458 ( $\text{M}^++1$ ), 330; Anal. Calcd for  $\text{C}_{18}\text{H}_{20}\text{INO}_3\text{S}$ : C, 47.27; H, 4.41; N, 3.06. Found; C, 47.17; H, 4.55; N, 3.03.

**(1*R*\*,2*R*\*,3*R*\*)-N-Tosyl 1,2-imino-3-iodocyclopentane (2i).** **2i** was prepared from **1i** (118 mg, 0.5 mmol) in accordance with general procedure of iodoaziridination. Purification of the residue by column chromatography (hexane / EtOAc = 9) gave **2i** (165 mg, 92 %). **2i**: colorless solid; mp 121 °C; IR (KBr) 1320, 1154  $\text{cm}^{-1}$ ;  $^1\text{H}$ -NMR ( $\text{CDCl}_3$ )  $\delta$  7.79 (2H, d,  $J$  = 8.4 Hz), 7.34 (2H, d,  $J$  = 8.4 Hz), 4.28 (1H, d,  $J$  = 5.0 Hz), 3.74 (1H, d,  $J$  = 4.3 Hz), 3.50 (1H, brd,  $J$  = 4.3 Hz), 2.45 (3H, s), 1.80-2.08 (4H, m);  $^{13}\text{C}$ -NMR ( $\text{CDCl}_3$ )  $\delta$  144.6, 135.0, 129.7, 127.6, 51.0,

46.4, 31.9, 24.8, 21.6; MS ( $m/z$ ) 364 ( $M^{++1}$ ), 236; Anal. Calcd for  $C_{12}H_{14}INO_2S$ : C, 39.68; H, 3.88; N, 3.85. Found; C, 39.69; H, 4.13; N, 3.98.

**(1*R*\*,2*R*\*,3*R*\*)-N-Tosyl 1,2-imino-3-iodocycloheptane (2j).** **2j** was prepared from **1j** (132 mg, 0.5 mmol) in accordance with general procedure of iodoaziridination. Purification of the residue by column chromatography (hexane / EtOAc = 9) gave **2j** (185 mg, 95 %). **2j**: colorless solid; mp 114 °C; IR (KBr) 1320, 1155  $cm^{-1}$ ;  $^1H$ -NMR ( $CDCl_3$ )  $\delta$  7.81 (2H, d,  $J$  = 8.3 Hz), 7.34 (2H, d,  $J$  = 8.3 Hz), 4.57 (1H, dt,  $J$  = 2.0, 5.7 Hz), 3.36 (1H, dd,  $J$  = 5.7, 7.6 Hz), 3.09 (1H, ddd,  $J$  = 2.7, 5.2, 7.6 Hz), 2.45 (3H, s), 1.38-1.97 (8H, m);  $^{13}C$ -NMR ( $CDCl_3$ )  $\delta$  144.5, 135.0, 129.7, 127.7, 49.8, 46.2, 35.4, 31.3, 28.6, 26.5, 24.2, 21.6; MS ( $m/z$ ) 392 ( $M^{++1}$ ), 264; Anal. Calcd for  $C_{14}H_{18}INO_2S$ : C, 42.98; H, 4.63; N, 3.58. Found; C, 43.09; H, 4.70; N, 3.67.

**(1*R*\*,2*R*\*,3*R*\*)-N-Tosyl 1,2-imino-3-iodocyclohexane (2k).** **2k** was prepared from **1k** (126 mg, 0.5 mmol) in accordance with general procedure of iodoaziridination. Purification of the residue by column chromatography (hexane / EtOAc = 9) gave **2k** (118 mg, 63 %). **2k**: colorless solid; mp 63 °C; IR (KBr) 1324, 1159  $cm^{-1}$ ;  $^1H$ -NMR ( $CDCl_3$ )  $\delta$  7.79 (2H, d,  $J$  = 8.5 Hz), 7.35 (2H, d,  $J$  = 8.5 Hz), 4.45 (1H, brt,  $J$  = 4.0 Hz), 3.46 (1H, d,  $J$  = 6.1 Hz), 3.09 (1H, t,  $J$  = 6.1 Hz), 2.46 (3H, s), 1.33-2.01 (6H, m);  $^{13}C$ -NMR ( $CDCl_3$ )  $\delta$  144.5, 135.0, 129.8, 127.7, 45.9, 40.0, 29.7, 24.7, 21.6, 21.3, 17.5; MS ( $m/z$ ) 378 ( $M^{++1}$ ), 250; Anal. Calcd for  $C_{13}H_{16}INO_2S$ : C, 41.39; H, 4.27; N, 3.71. Found; C, 41.55; H, 4.40; N, 3.71.
